# Supplementary material for: The neutralizing function of the anti-HTLV-1 antibody is essential in preventing in vivo transmission of HTLV-1 to human T cells in NOD-SCID/γcnull (NOG) mice
Source: PubMed Central journal article supplement (PMC4180130; doi:10.1186/s12977-014-0074-z), 2014-08-28
Supplement: 12977_2014_74_MOESM3_ESM.pdf [file 12977_2014_74_MOESM3_ESM.pdf]

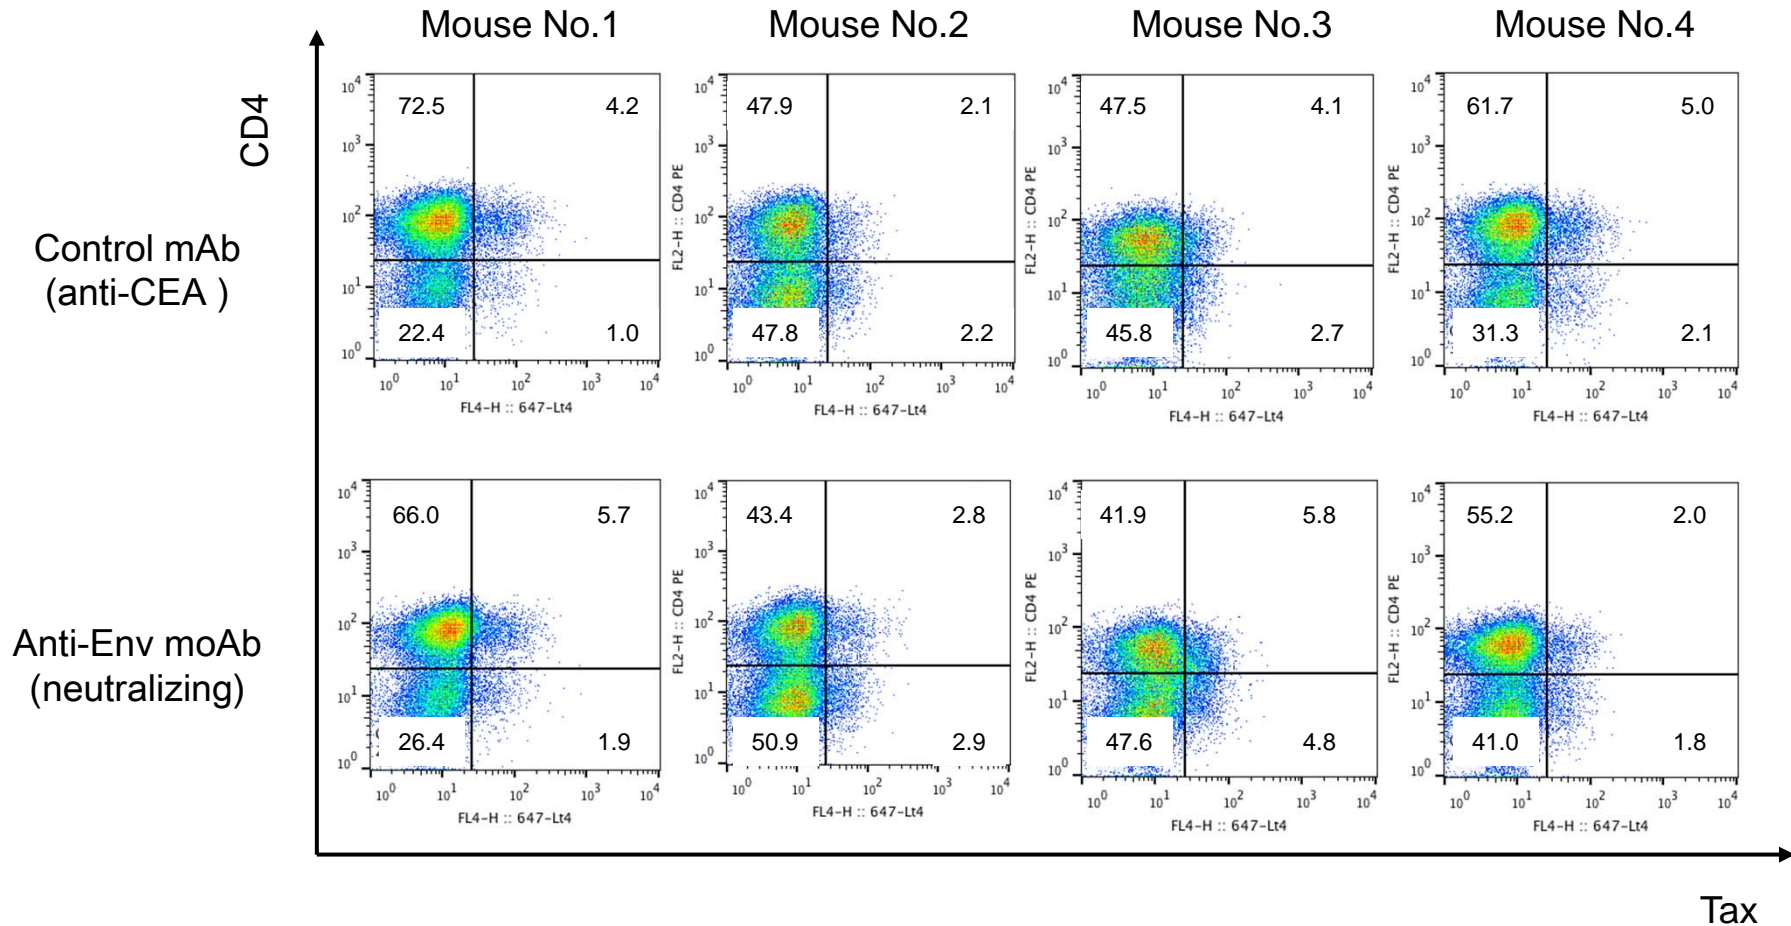

Flow cytometric studies showed that the human lymphocytes recovered from mouse spleens express the amount of Tax protein after short-term (16 h) cultivation ex vivo, indicating that the neutralizing anti-Env Ab (clone LAT-27) injection once after PBMC transplantation did not block the in vivo transmission of HTLV-1.
